# Supplementary material
Source: PubMed Central journal article supplement (PMC9616803)
Supplement: mmc1.pdf [file mmc1.pdf]

**Neuron, Volume 110**

**Supplemental information**

**Neural correlates of blood flow**

**measured by ultrasound**

**Anwar O. Nunez-Elizalde, Michael Krumin, Charu Bai Reddy, Gabriel Montaldo, Alan Urban, Kenneth D. Harris, and Matteo Carandini**

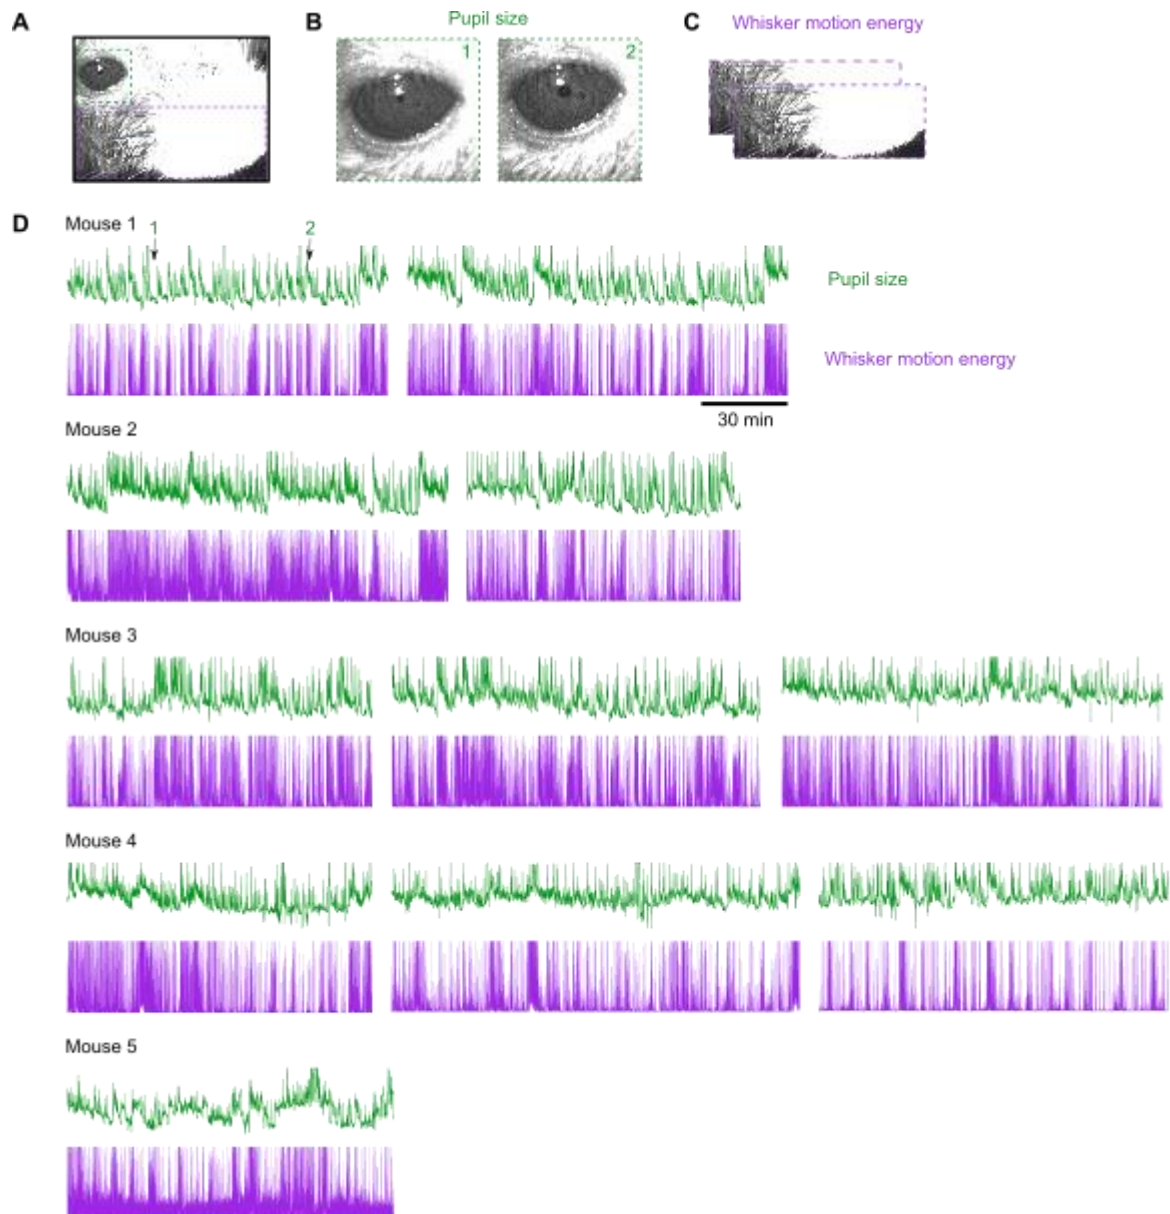

Supplemental Figure 1. **Behavioral monitoring.** Related to Figure 1.

(A) Example frame from a camera pointed at the mouse face, showing regions analyzed for eye (*green*) and whiskers (*purple*).  
 (B) Example frames of the eye, used to estimate pupil size, showing a frame with smaller pupil (1) and one with larger pupil (2).

(C) Example frames of the whiskers, used to estimate whisker motion energy.

(D) Pupil size (*green*) and whisker motion energy (*purple*) for 11 recording sessions in 5 mice. Arrows 1 and 2 mark the frames in B.

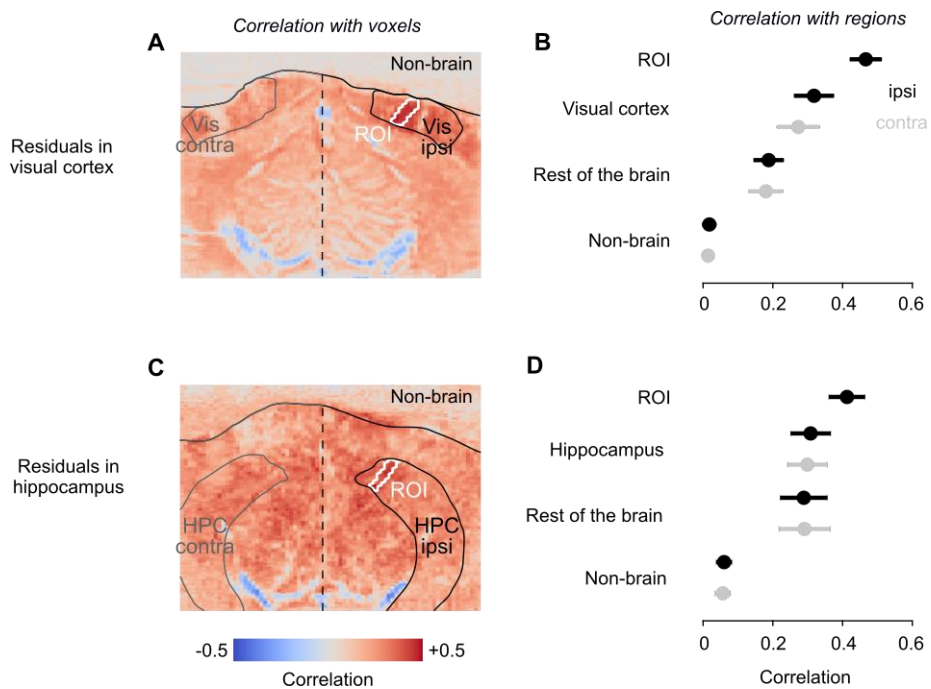

Supplemental Figure 2. **fUSI residuals correlate with the whole brain.** Related to Figure 4.

**(A)** Correlations between fUSI residuals (fUSI signals minus filtered firing rate) in visual cortex with fUSI signals in the whole slice.

**(B)** Correlations with fUSI signals in the ROI, in the rest of visual cortex, in contralateral visual cortex, and in the rest of the brain.

**(C,D)** Same, for fUSI residuals in hippocampus.

|                            | Bai Reddy | Carandini | Harris | Krumin | Montaldo | Nunez-Elizalde | Urban |
|----------------------------|-----------|-----------|--------|--------|----------|----------------|-------|
| Conceptualization          |           | •         | •      | •      |          | •              |       |
| Methodology                | •         | •         | •      | •      | •        | •              | •     |
| Software                   |           |           |        | •      | •        | •              | •     |
| Formal Analysis            |           |           |        | •      |          | •              |       |
| Investigation              | •         |           |        | •      |          | •              |       |
| Resources                  |           | •         | •      |        | •        |                | •     |
| Writing – Original Draft   |           | •         |        |        |          | •              |       |
| Writing – Review & Editing |           | •         | •      | •      | •        | •              | •     |
| Visualization              |           | •         |        |        |          | •              |       |
| Supervision                |           | •         | •      |        |          |                |       |
| Funding Acquisition        |           | •         | •      |        |          |                |       |

Supplemental Figure 3. **Author contributions.** Matrix representation of the information in Author Contributions.
